# Supplementary material for: Structural systematic design of organic templated samarium sulfates and their luminescence property
Source: Royal Society of Chemistry journal article supplement (doi:10.1039/c1ra00749a), 2011-11-03
Supplement: c1ra00749a.pdf [file c1ra00749a.pdf]

# Structural Systematic Design of Organic Templated Samarium Sulfates and Their Luminescence Property

Deng Zhang<sup>a</sup>, Lei Zheng<sup>a</sup>, Xinmin Qiu<sup>a</sup>, Yan Xu<sup>a,b</sup>, Jie Fu<sup>a</sup>, Su Chen<sup>a</sup>

<sup>a</sup>College of Chemistry and Chemical Engineering, State Key Laboratory of Materials-Oriented Chemical Engineering, Nanjing University of Technology, Nanjing, 210009, PR China.

<sup>b</sup>Coordination Chemistry Institute, State Key Laboratory of Coordination Chemistry, Nanjing University, Nanjing 210093, PR China.

E-mail: yanxu@njut.edu.cn; Tel: (+86)25-83587857

**Table S1** Selected bond lengths (Å) and angles (°) for **1-4**.

| 1                |           |                   |            |                   |            |
|------------------|-----------|-------------------|------------|-------------------|------------|
| Sm(1)-O(18)      | 2.511(4)  | O(21)-Sm(2)-O(5)  | 81.17(13)  | O(21)-Sm(2)-O(7)  | 101.32(13) |
| Sm(1)-O(8)       | 2.519(3)  | O(14)-Sm(2)-O(5)  | 55.87(11)  | O(14)-Sm(2)-O(7)  | 73.15(12)  |
| Sm(2)-O(21)      | 2.315(4)  | O(7)-Sm(2)-O(5)   | 72.77(11)  | O(13)-Sm(3)-O(11) | 89.93(12)  |
| Sm(2)-O(14)      | 2.491(3)  | O(21)-Sm(2)-O(10) | 76.93(12)  | O(16)-Sm(3)-O(2)  | 69.92(11)  |
| Sm(2)-O(7)       | 2.516(4)  | O(14)-Sm(2)-O(10) | 125.06(11) | O(4)-Sm(3)-O(2)   | 55.12(10)  |
| Sm(2)-O(5)       | 2.533(3)  | O(7)-Sm(2)-O(10)  | 55.69(11)  | O(17)-Sm(3)-O(2)  | 118.34(11) |
| Sm(2)-O(10)      | 2.533(3)  | O(5)-Sm(2)-O(10)  | 117.25(11) | O(13)-Sm(3)-O(2)  | 145.82(11) |
| Sm(3)-O(16)      | 2.396(3)  | O(16)-Sm(3)-O(4)  | 88.77(12)  | O(11)-Sm(3)-O(2)  | 124.22(11) |
| Sm(3)-O(4)       | 2.437(3)  | O(16)-Sm(3)-O(17) | 76.92(11)  | O(16)-Sm(3)-O(8)  | 135.62(11) |
| Sm(3)-O(17)      | 2.464(3)  | O(4)-Sm(3)-O(17)  | 74.23(11)  | O(4)-Sm(3)-O(8)   | 135.61(11) |
| Sm(3)-O(13)      | 2.493(3)  | O(16)-Sm(3)-O(13) | 86.48(12)  | O(17)-Sm(3)-O(8)  | 110.28(11) |
| Sm(3)-O(11)      | 2.525(3)  | O(4)-Sm(3)-O(13)  | 151.74(11) | O(13)-Sm(3)-O(8)  | 54.95(11)  |
| Sm(3)-O(2)       | 2.631(3)  | O(17)-Sm(3)-O(13) | 77.56(12)  | O(11)-Sm(3)-O(8)  | 74.35(11)  |
| Sm(3)-O(8)       | 2.642(3)  | O(16)-Sm(3)-O(11) | 132.48(11) | O(2)-Sm(3)-O(8)   | 129.93(10) |
| O(18)-Sm(1)-O(8) | 55.78(11) | O(4)-Sm(3)-O(11)  | 73.03(11)  | O(17)-Sm(3)-O(11) | 56.12(11)  |

  

| 2           |          |                   |            |                   |            |
|-------------|----------|-------------------|------------|-------------------|------------|
| Sm(1)-O(23) | 2.328(5) | O(13)-Sm(1)-O(22) | 84.41(16)  | O(10)-Sm(1)-O(8)  | 66.49(14)  |
| Sm(1)-O(13) | 2.376(5) | O(6)-Sm(1)-O(22)  | 153.30(18) | O(15)-Sm(2)-O(21) | 77.99(18)  |
| Sm(1)-O(6)  | 2.457(5) | O(23)-Sm(1)-O(26) | 76.24(17)  | O(15)-Sm(2)-O(4)  | 152.28(18) |
| Sm(1)-O(22) | 2.471(4) | O(13)-Sm(1)-O(26) | 154.41(16) | O(21)-Sm(2)-O(4)  | 87.4(2)    |
| Sm(1)-O(26) | 2.472(5) | O(6)-Sm(1)-O(26)  | 117.37(17) | O(15)-Sm(2)-O(20) | 83.16(18)  |
| Sm(1)-O(10) | 2.627(5) | O(22)-Sm(1)-O(26) | 75.95(17)  | O(21)-Sm(2)-O(20) | 95.5(2)    |
| Sm(1)-O(8)  | 2.699(5) | O(23)-Sm(1)-O(10) | 77.96(16)  | O(4)-Sm(2)-O(20)  | 74.85(18)  |
| Sm(2)-O(15) | 2.313(5) | O(13)-Sm(1)-O(10) | 68.87(15)  | O(15)-Sm(2)-O(3)  | 126.72(17) |
| Sm(2)-O(21) | 2.337(5) | O(6)-Sm(1)-O(10)  | 55.30(15)  | O(21)-Sm(2)-O(3)  | 154.89(17) |
| Sm(2)-O(4)  | 2.357(5) | O(22)-Sm(1)-O(10) | 141.55(15) | O(4)-Sm(2)-O(3)   | 71.71(17)  |

|                   |            |                   |            |                   |            |
|-------------------|------------|-------------------|------------|-------------------|------------|
| Sm(2)-O(20)       | 2.385(5)   | O(26)-Sm(1)-O(10) | 118.46(15) | O(20)-Sm(2)-O(3)  | 92.37(17)  |
| Sm(2)-O(3)        | 2.428(5)   | O(23)-Sm(1)-O(8)  | 77.28(17)  | O(15)-Sm(2)-O(22) | 75.34(16)  |
| Sm(2)-O(22)       | 2.769(4)   | O(13)-Sm(1)-O(8)  | 133.66(16) | O(21)-Sm(2)-O(22) | 151.92(15) |
| O(23)-Sm(1)-O(13) | 82.03(18)  | O(6)-Sm(1)-O(8)   | 77.50(16)  | O(4)-Sm(2)-O(22)  | 112.88(18) |
| O(23)-Sm(1)-O(6)  | 132.65(17) | O(22)-Sm(1)-O(8)  | 125.53(17) | O(20)-Sm(2)-O(22) | 72.87(17)  |
| O(13)-Sm(1)-O(6)  | 87.35(16)  | O(26)-Sm(1)-O(8)  | 53.77(15)  | O(3)-Sm(2)-O(22)  | 53.02(15)  |
| O(23)-Sm(1)-O(22) | 71.15(18)  |                   |            |                   |            |
| <b>3</b>          |            |                   |            |                   |            |
| Sm(1)-O(7)        | 2.368(2)   | O(7)-Sm(1)-O(9)   | 136.06(7)  | O(1)-Sm(1)-O(3)   | 57.47(6)   |
| Sm(1)-O(9)        | 2.3832(19) | O(7)-Sm(1)-O(1)   | 85.71(7)   | O(7)-Sm(1)-O(10)  | 78.35(7)   |
| Sm(1)-O(1)        | 2.4372(19) | O(9)-Sm(1)-O(1)   | 133.96(6)  | O(9)-Sm(1)-O(10)  | 57.72(6)   |
| Sm(1)-O(3)        | 2.4657(18) | O(7)-Sm(1)-O(3)   | 140.73(7)  | O(1)-Sm(1)-O(10)  | 153.41(7)  |
| Sm(1)-O(10)       | 2.4946(19) | O(9)-Sm(1)-O(3)   | 76.76(6)   | O(3)-Sm(1)-O(10)  | 128.78(6)  |
| <b>4</b>          |            |                   |            |                   |            |
| Sm(1)-O(6)        | 2.413(5)   | O(6)-Sm(1)-O(1)   | 57.57(16)  | O(1)-Sm(1)-O(5)   | 150.37(17) |
| Sm(1)-O(2)        | 2.437(5)   | O(2)-Sm(1)-O(1)   | 130.92(16) | O(4)-Sm(1)-O(5)   | 94.92(17)  |
| Sm(1)-O(1)        | 2.457(4)   | O(6)-Sm(1)-O(4)   | 79.37(18)  | O(6)-Sm(1)-O(3)   | 89.05(17)  |
| Sm(1)-O(4)        | 2.471(5)   | O(2)-Sm(1)-O(4)   | 74.37(16)  | O(2)-Sm(1)-O(3)   | 130.52(16) |
| Sm(1)-O(5)        | 2.501(4)   | O(1)-Sm(1)-O(4)   | 114.67(17) | O(1)-Sm(1)-O(3)   | 74.99(16)  |
| Sm(1)-O(3)        | 2.536(5)   | O(6)-Sm(1)-O(5)   | 135.00(16) | O(4)-Sm(1)-O(3)   | 56.20(15)  |
| O(6)-Sm(1)-O(2)   | 79.24(16)  | O(2)-Sm(1)-O(5)   | 56.55(16)  | O(5)-Sm(1)-O(3)   | 124.69(16) |

**Table S2** Hydrogen bonds of compound **1**.

| D—H...A         | D—H(Å) | H...A(Å) | D...A(Å)  | D—H...A(°) |
|-----------------|--------|----------|-----------|------------|
| N6A--H6AD...O13 | 0.9000 | 2.5200   | 3.259(14) | 140.00     |
| N6A--H6AD...O20 | 0.9000 | 2.1800   | 2.998(14) | 151.00     |
| N1--H1E...O12   | 0.9000 | 1.9800   | 2.841(7)  | 160.00     |
| N6--H6AE...O5   | 0.9500 | 2.5300   | 3.002(17) | 111.00     |
| N6--H6AE...O24  | 0.9500 | 2.1000   | 2.796(15) | 129.00     |
| N2--H2D...O11   | 0.9000 | 2.4800   | 2.878(8)  | 107.00     |
| N2--H2D...O20   | 0.9000 | 2.1200   | 2.912(8)  | 147.00     |
| N2--H2E...O23   | 0.9000 | 2.0500   | 2.866(9)  | 150.00     |
| N2--H2E...O11   | 0.9000 | 2.5200   | 2.878(8)  | 104.00     |
| N3--H3E...O10   | 0.9000 | 2.3000   | 2.775(6)  | 113.00     |
| N3--H3E...O3    | 0.9000 | 2.1500   | 2.939(5)  | 146.00     |
| N4--H4E...O7    | 0.9000 | 2.4000   | 3.099(9)  | 134.00     |
| N4--H4E...O14   | 0.9000 | 2.5100   | 3.323(5)  | 151.00     |
| N5--H5D...O6    | 0.9000 | 2.4400   | 3.201(12) | 143.00     |
| N5--H5D...O12   | 0.9000 | 2.1600   | 2.979(13) | 151.00     |
| N5--H5E...O9    | 0.9000 | 2.4500   | 3.169(13) | 137.00     |
| N5--H5E...O19   | 0.9000 | 2.0400   | 2.867(14) | 152.00     |
| N6--H6D...O22   | 0.9000 | 2.3200   | 3.130(16) | 149.00     |
| N6--H6D...O21   | 0.9000 | 2.4800   | 3.176(14) | 135.00     |

|               |        |        |           |        |
|---------------|--------|--------|-----------|--------|
| N6--H6E...O5  | 0.9000 | 2.1500 | 3.002(17) | 158.00 |
| C1--H1A...O19 | 0.9600 | 2.4700 | 3.287(8)  | 143.00 |
| C1--H1C...O13 | 0.9600 | 2.5000 | 3.233(8)  | 133.00 |
| C3--H3C...O24 | 0.9600 | 2.5800 | 3.238(14) | 126.00 |

**Table S3** Hydrogen bonds of compound **2**.

| D—H...A       | D—H(Å) | H...A(Å) | D...A(Å)  | D—H...A(°) |
|---------------|--------|----------|-----------|------------|
| N1--H1C...O20 | 0.8900 | 2.0700   | 2.856(8)  | 147.00     |
| N1--H1C...O14 | 0.8900 | 2.5800   | 3.066(9)  | 116.00     |
| N1--H1D...O18 | 0.8900 | 2.2600   | 2.936(9)  | 132.00     |
| N1--H1E...O4  | 0.8900 | 2.5400   | 3.207(9)  | 133.00     |
| N1--H1E...O11 | 0.8900 | 2.5600   | 3.325(9)  | 145.00     |
| N2--H2D...O6  | 0.8900 | 2.5000   | 3.095(8)  | 125.00     |
| N3--H3C...O5  | 0.8900 | 2.2500   | 2.996(9)  | 141.00     |
| N3--H3C...O27 | 0.8900 | 2.3700   | 3.090(8)  | 138.00     |
| N3--H3D...O10 | 0.8900 | 2.1100   | 2.948(8)  | 156.00     |
| N3--H3D...O13 | 0.8900 | 2.5200   | 3.134(8)  | 127.00     |
| N4--H4C...O26 | 0.8900 | 2.5300   | 2.851(8)  | 102.00     |
| N4--H4D...O14 | 0.8900 | 2.3800   | 2.921(8)  | 119.00     |
| N4--H4D...O26 | 0.8900 | 2.3700   | 2.851(8)  | 114.00     |
| N5--H5C...O17 | 0.8900 | 2.3700   | 3.016(9)  | 130.00     |
| N6--H6E...O25 | 0.8900 | 1.9000   | 2.777(10) | 166.00     |
| N7--H7C...O28 | 0.8900 | 1.9900   | 2.882(9)  | 177.00     |
| N7--H7D...O16 | 0.8900 | 2.1600   | 2.962(8)  | 150.00     |
| N7--H7E...O11 | 0.8900 | 2.0400   | 2.894(8)  | 159.00     |
| N8--H8C...O5  | 0.8900 | 2.1600   | 2.890(8)  | 139.00     |
| N8--H8C...O27 | 0.8900 | 2.4300   | 3.194(8)  | 144.00     |
| N8--H8D...O27 | 0.8900 | 2.0000   | 2.893(8)  | 176.00     |
| N8--H8E...O1  | 0.8900 | 1.8500   | 2.717(8)  | 163.00     |
| C5--H5A...O17 | 0.9700 | 2.5500   | 2.984(13) | 107.00     |
| C7--H7A...O1  | 0.9700 | 2.6000   | 3.250(9)  | 125.00     |
| C8--H8A...O16 | 0.9700 | 2.3400   | 3.135(9)  | 138.00     |
| C8--H8A...O19 | 0.9700 | 2.5100   | 3.101(9)  | 119.00     |
| C8--H8B...O2  | 0.9700 | 2.5200   | 3.350(9)  | 143.00     |

**Table S4** Hydrogen bonds of compound **3**.

| D—H...A        | D—H(Å)    | H...A(Å)  | D...A(Å) | D—H...A(°) |
|----------------|-----------|-----------|----------|------------|
| O1W--H1WA...O5 | 0.845(14) | 2.057(14) | 2.895(3) | 171.5(13)  |
| N1--H1D...O6   | 0.9000    | 2.5100    | 3.003(4) | 115.00     |
| N1--H1D...O10  | 0.9000    | 2.0300    | 2.890(3) | 160.00     |
| N1--H1E...O1   | 0.9000    | 2.4000    | 3.149(4) | 141.00     |
| N1--H1E...O2   | 0.9000    | 2.3700    | 3.023(3) | 129.00     |
| O1W--H1WB...O2 | 0.846(14) | 2.549(15) | 3.022(4) | 116.5(15)  |

|                 |           |           |          |           |
|-----------------|-----------|-----------|----------|-----------|
| O1W--H1WB...O2  | 0.846(14) | 2.086(15) | 2.921(4) | 168.9(16) |
| O1W--H1WC...O12 | 0.841(15) | 2.015(14) | 2.827(4) | 162(2)    |
| O2W--H2WA...O8  | 0.849(15) | 2.070(15) | 2.914(4) | 173.6(13) |
| O2W--H2WB...O1  | 0.847(12) | 2.098(18) | 2.909(4) | 160(2)    |
| O2W--H2WC...O9  | 0.843(12) | 2.51(2)   | 2.989(4) | 117.4(14) |
| O2W--H2WC...O9  | 0.843(12) | 2.214(10) | 3.001(3) | 156(2)    |

**Table S5** Hydrogen bonds of compound **4**.

| D—H...A         | D—H(Å) | H...A(Å) | D...A(Å)  | D—H...A(°) |
|-----------------|--------|----------|-----------|------------|
| N3A--H3AA...O10 | 0.9000 | 2.5800   | 2.99(2)   | 109.00     |
| N3A--H3AA...O11 | 0.9000 | 2.3300   | 3.09(2)   | 142.00     |
| N1--H1A...O3    | 0.9000 | 2.1800   | 2.870(10) | 133.00     |
| N1--H1A...O5    | 0.9000 | 2.2600   | 3.037(10) | 145.00     |
| N1--H1B...O11   | 0.9000 | 1.9100   | 2.788(11) | 166.00     |
| N3--H3AB...O10  | 1.4000 | 2.1200   | 2.880(14) | 108.00     |
| N2--H2A...O9    | 0.9000 | 1.8700   | 2.767(10) | 173.00     |
| N2--H2B...O1    | 0.9000 | 2.5200   | 3.204(9)  | 133.00     |
| N2--H2B...O12   | 0.9000 | 1.9500   | 2.827(10) | 163.00     |
| N3--H3A...O2    | 0.9000 | 2.0300   | 2.781(12) | 141.00     |
| N3--H3B...O10   | 0.9000 | 2.0200   | 2.880(14) | 159.00     |
| C2--H2D...O9    | 0.9600 | 2.4500   | 3.263(13) | 142.00     |
| C2--H2E...O11   | 0.9600 | 2.5000   | 3.402(12) | 156.00     |
| C5--H5B...O6    | 0.9600 | 2.4900   | 3.411(13) | 162.00     |
| C5--H5C...O6    | 0.9600 | 2.2900   | 3.174(13) | 152.00     |
| C6--H6A...O8    | 0.9600 | 2.5100   | 3.226(13) | 131.00     |
| C6--H6B...O2    | 0.9600 | 2.3900   | 3.168(13) | 138.00     |
| C6--H6C...O11   | 0.9600 | 2.2200   | 3.138(13) | 158.00     |

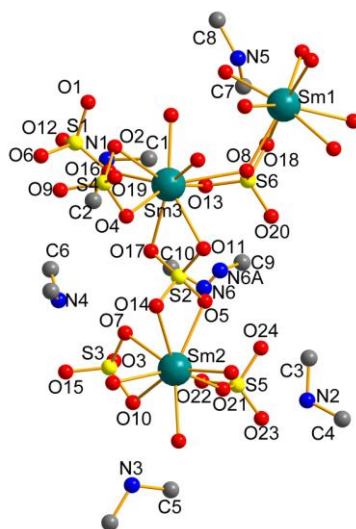

**Fig. S1** ORTEP view of the  $[(\text{CH}_3)_2\text{NH}_2]_9[\text{Sm}_5(\text{SO}_4)_{12}]$  **1** structure

showing the atom labeling scheme.

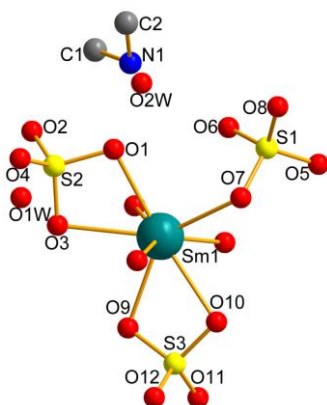

**Fig. S2** ORTEP view of the  $[\text{H}_3\text{O}]_2[(\text{CH}_3)_2\text{NH}_2][\text{Sm}(\text{SO}_4)_3]$  **3** structure showing the atom labeling scheme.

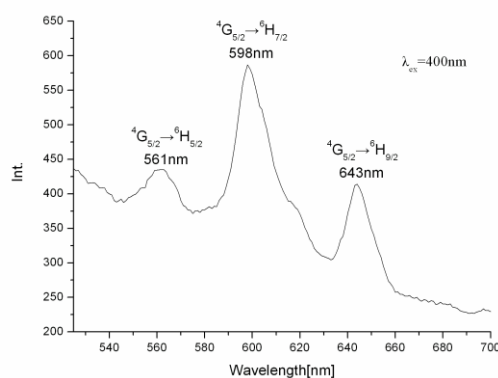

**Fig. S3** The photoluminescence spectra of compound **1**. The excitation wavelength is 400 nm, and spectrum is taken at room temperature.

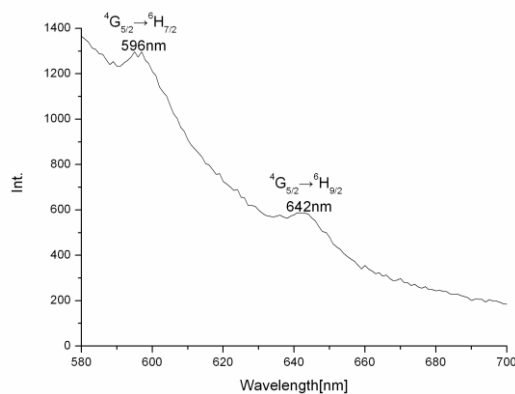

**Fig. S4** The photoluminescence spectra of compound **2**. The excitation

wavelength is 400 nm, and spectrum is taken at room temperature.

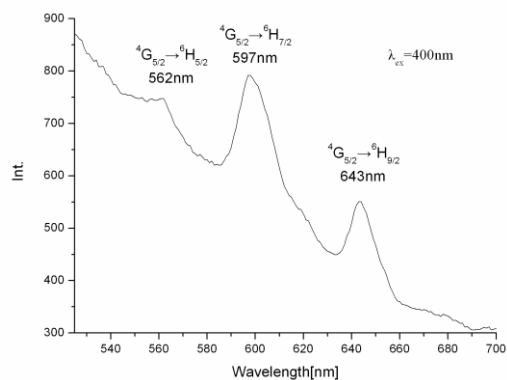

**Fig. S5** The photoluminescence spectra of compound **4**. The excitation wavelength is 400 nm, and spectrum is taken at room temperature.

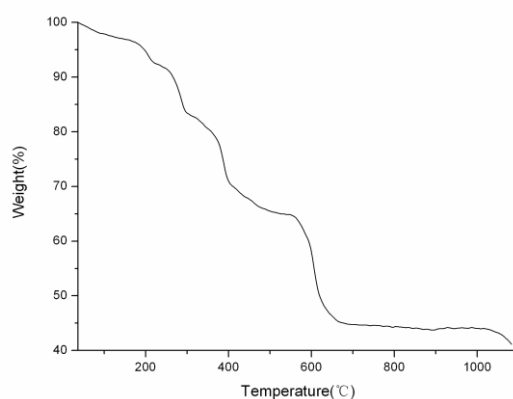

**Fig. S6** TG curve of compound **1**.

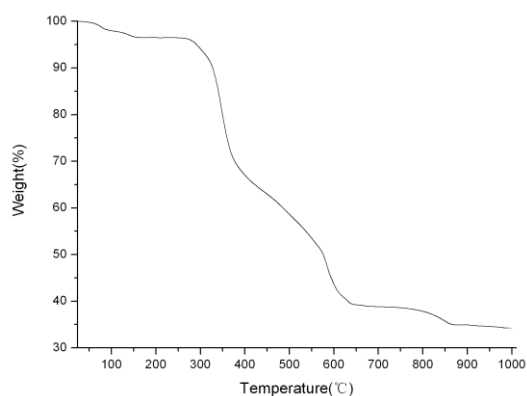

**Fig. S7** TG curve of compound **2**.

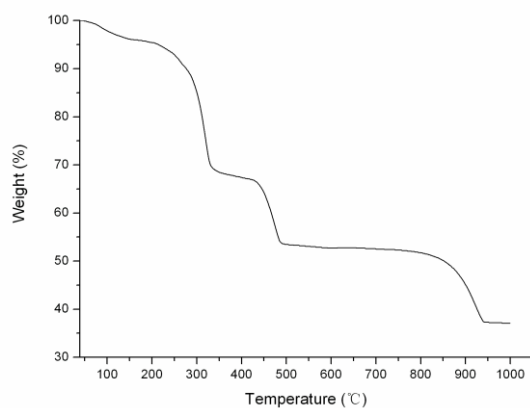

**Fig. S8** TG curve of compound **3**.

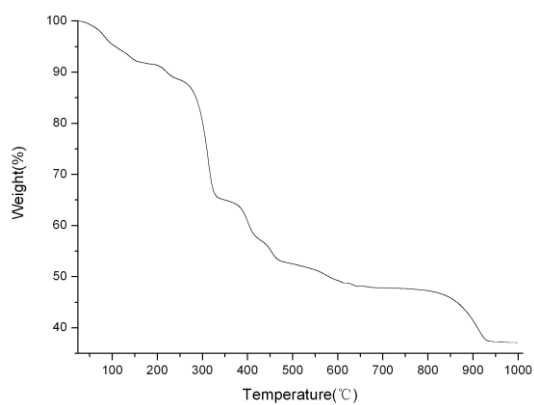

**Fig. S9** TG curve of compound **4**.

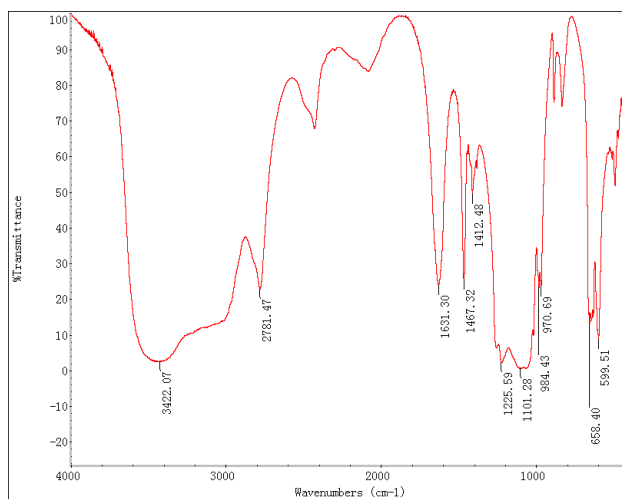

**Fig. S10** IR of compound **1**.

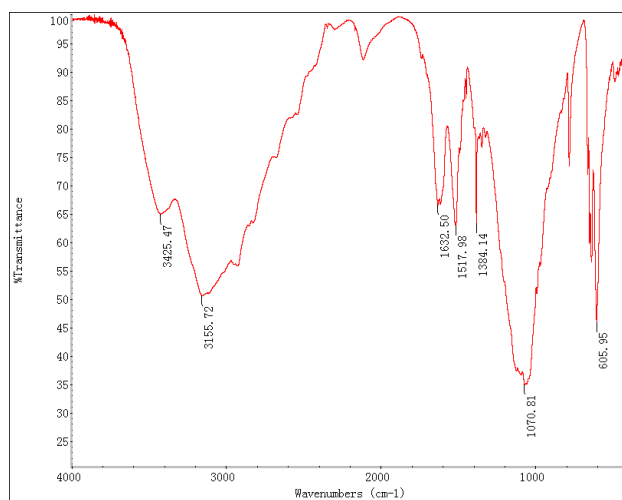

**Fig. S11** IR of compound 2.

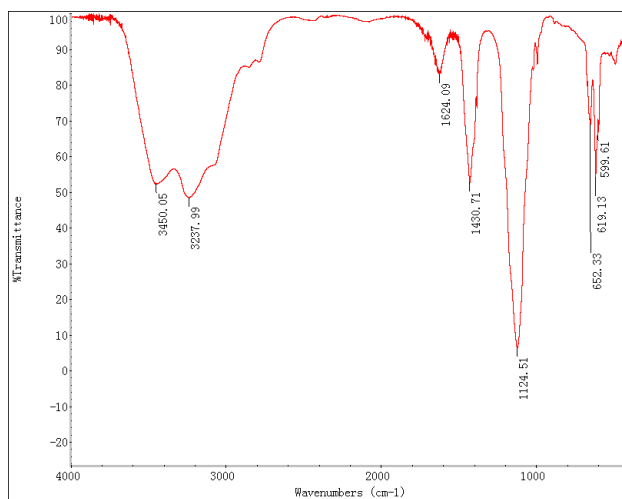

**Fig. S12** IR of compound 3.

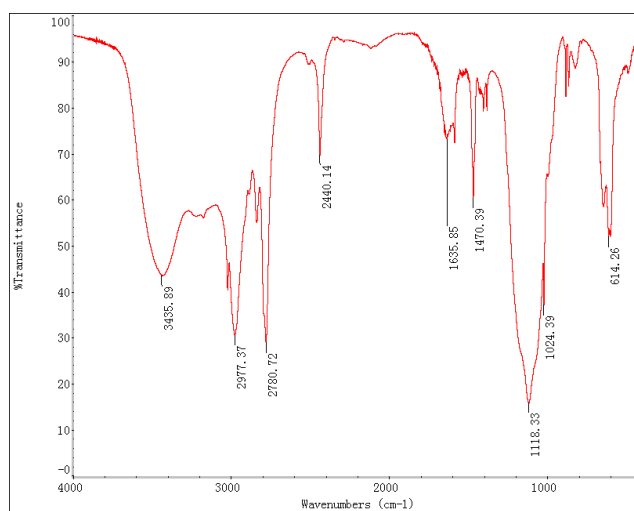

**Fig. S13** IR of compound 4.
